# Supplementary material for: Fluid administration rate for uncontrolled intraabdominal hemorrhage in swine
Source: PubMed Central journal article supplement (PMC6264836; doi:10.1371/journal.pone.0207708), 2018-11-29
Supplement: pone.0207708.s002.pdf [file pone.0207708.s002.pdf]

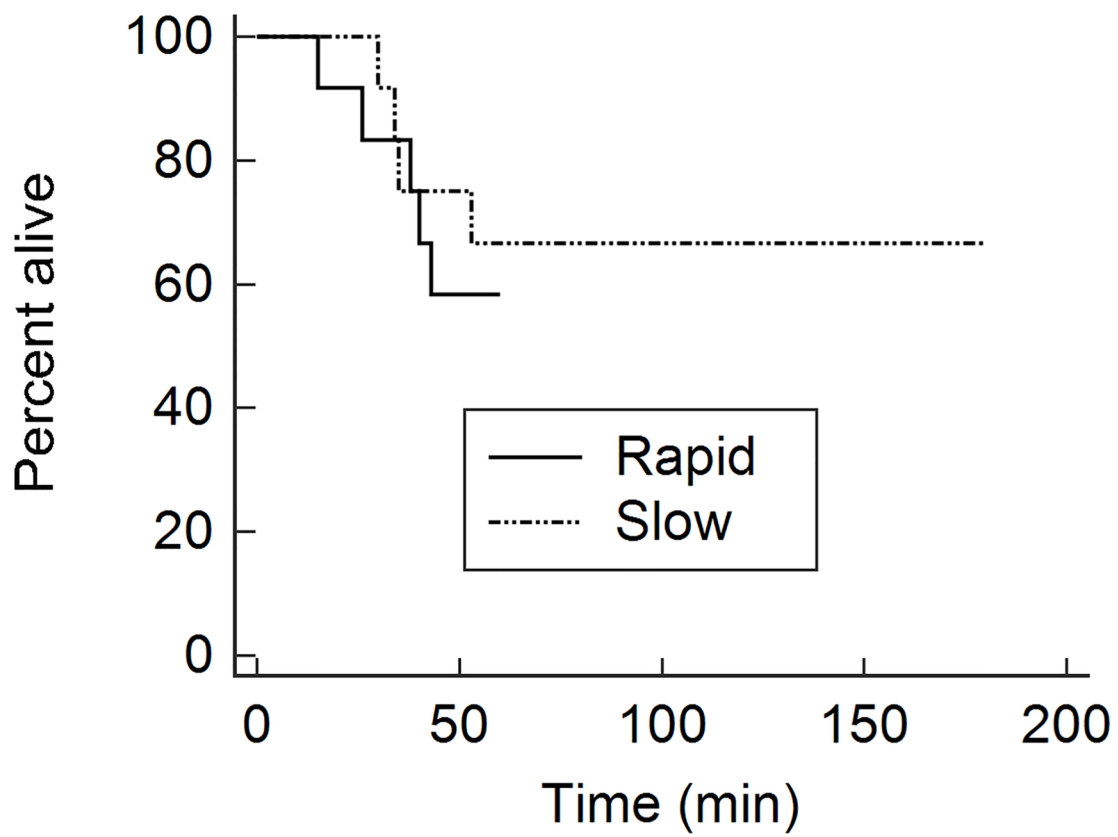

Fig. S1
